# Supplementary material for: Layer-by-layer assembled polyaniline/carbon nanomaterial-coated cellulosic aerogel electrodes for high-capacitance supercapacitor applications
Source: Royal Society of Chemistry journal article supplement (doi:10.1039/c8ra01754a), 2018-01-01
Supplement: c8ra01754a1.pdf [file c8ra01754a1.pdf]

## Supporting Information

### Layer-by-layer assembled polyaniline/carbon nanomaterials-coated cellulosic aerogel electrodes for high-capacitance supercapacitor applications

Shaoyi Lyu,<sup>a,b\*</sup> Yanping Chen,<sup>b,c</sup> Shenjie Han,<sup>b</sup> Limin Guo,<sup>b</sup> Zhilin Chen,<sup>b</sup> Yun Lu,<sup>b</sup> Yuan Chen,<sup>b</sup> Na Yang<sup>b</sup> and Siqun Wang<sup>d,b\*</sup>

<sup>a</sup> Research Institute of Forestry New Technology, Chinese Academy of Forestry, Beijing 100091, China.

<sup>b</sup> Research Institute of Wood Industry, Chinese Academy of Forestry, Beijing 100091, China.

<sup>c</sup> Beijing Engineering Research Center of Cellulose and Its Derivatives, School of Materials Science and Engineering, Beijing Institute of Technology, Beijing 100081, China.

<sup>d</sup> Center for Renewable Carbon, University of Tennessee, Knoxville, Tennessee, 37996, USA.

\*Author for correspondence. Email: lvsy@caf.ac.cn (S. Lyu), swang@utk.edu (S. Wang).

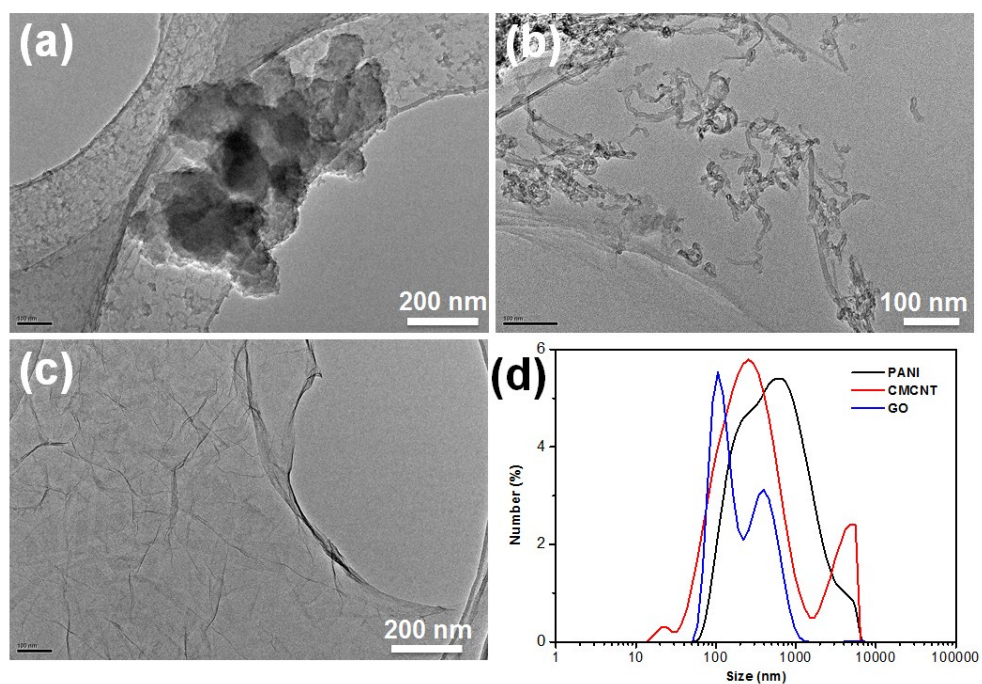

**Figure S1.** TEM images of (a) PANI, (b) CMCNT, and (c) GO. (d) Particle-size distributions of PANI, CMCNT, and GO.

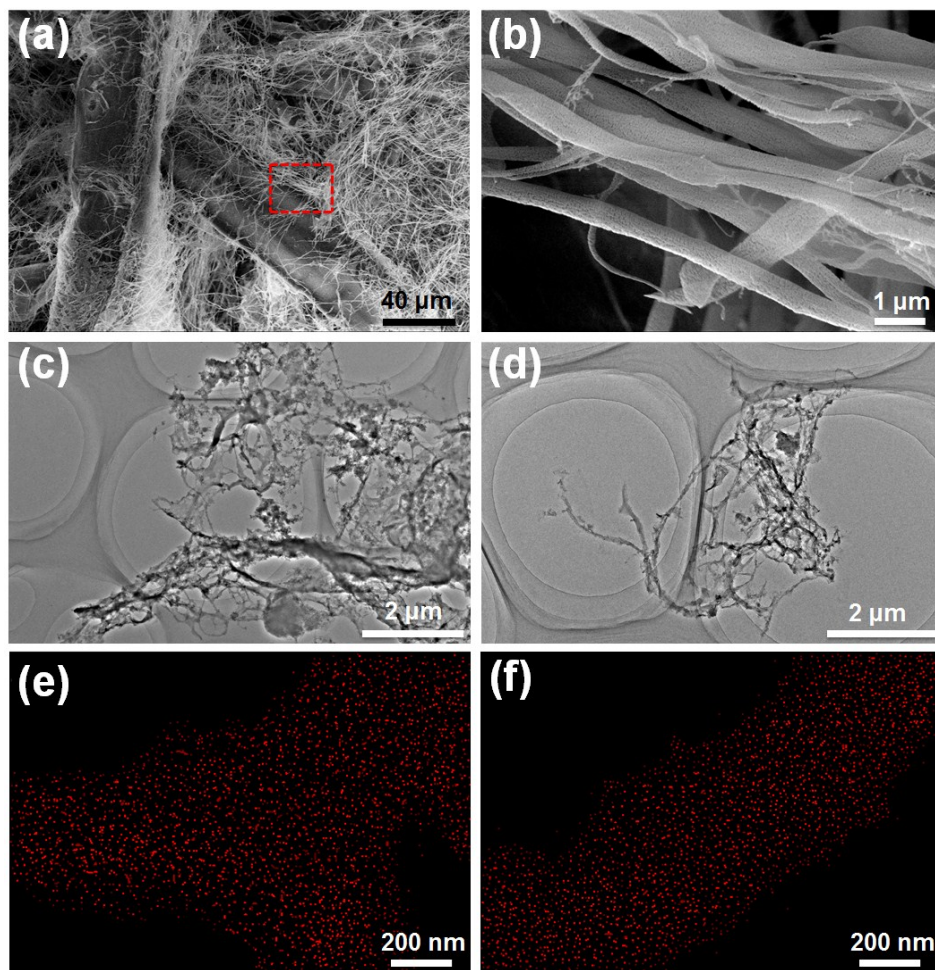

**Figure S2.** (a) SEM images of the WPF/CNC aerogel. (b) Enlarged SEM image of the section enclosed by the red dashed box in panel (a). TEM images of (c) 10 times LbL assembly of PANI/CMCNT and (d) PANI/GO on the nanofibers formed by CNC at a small magnification. Corresponding elemental mapping images of N from SEM/EDS image of (e) (PANI/CMCNT)<sub>10</sub> and (f) (PANI/GO)<sub>10</sub> on CNC nanofibers.

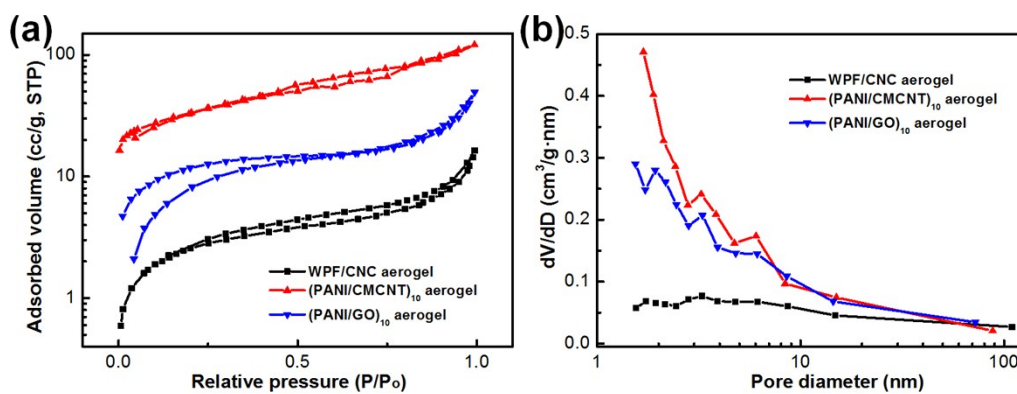

**Figure S3.** Typical nitrogen adsorption/desorption isotherms (a) and pore size distributions of the aerogels (b) for the WPF/CNC aerogel, the (PANI/CMCNT)<sub>10</sub> aerogel, and the (PANI/GO)<sub>10</sub> aerogel.

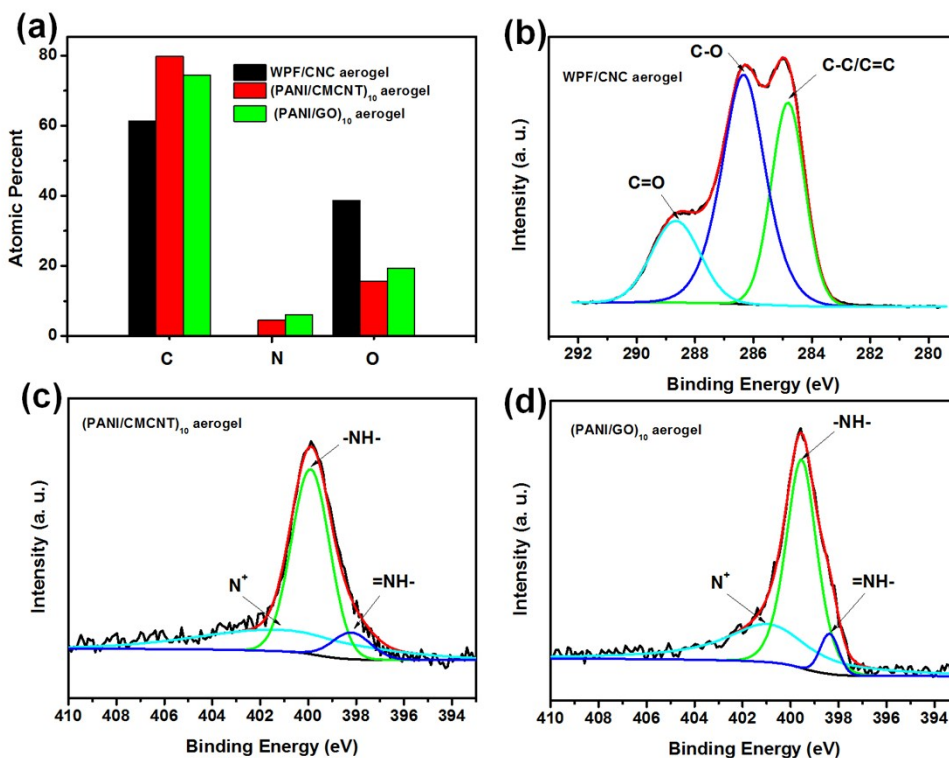

**Figure S4.** (a) Atomic percentages in the WPF/CNC, (PANI/CMCNT)<sub>10</sub>, and (PANI/GO)<sub>10</sub> aerogels. (b) High-resolution XPS C1s spectrum of the WPF/CNC aerogel, and its deconvolution. High-resolution XPS N1s spectra of (c) the (PANI/CMCNT)<sub>10</sub> aerogel and (d) the (PANI/GO)<sub>10</sub> aerogel, and their deconvolutions.

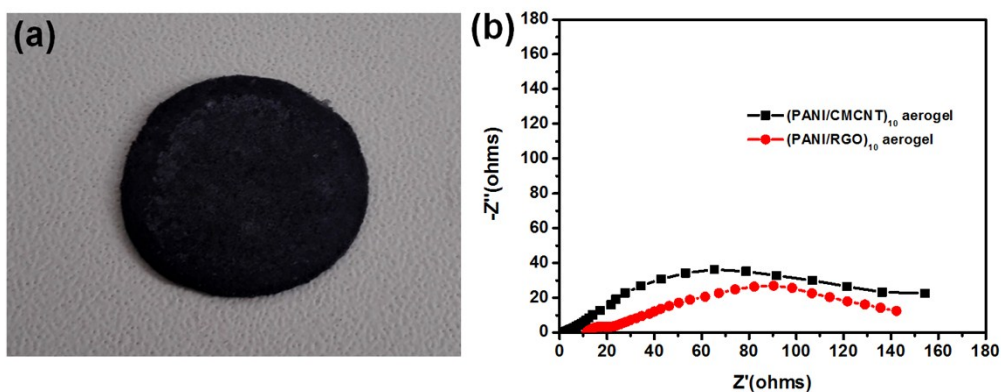

**Figure S5.** (a) Representative photographic image of a compressed aerogel film. (b) Nyquist plots for the (PANI/CMCNT)<sub>10</sub> and (PANI/RGO)<sub>10</sub> aerogel electrodes under three-electrode testing conditions.



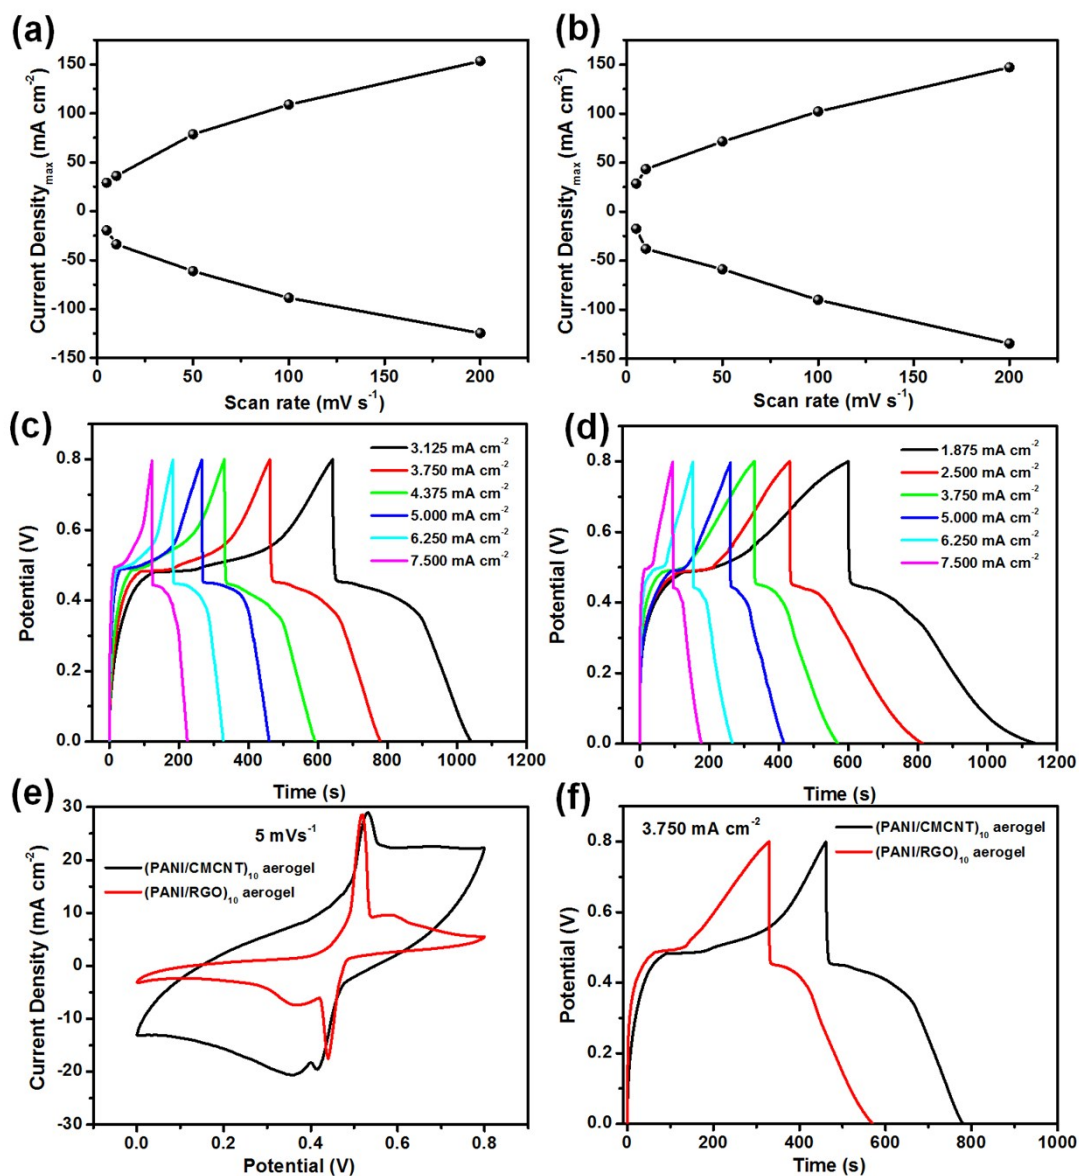

**Figure S6.** Maximum current vs. scan rate for (a) the (PANI/CMCNT)<sub>10</sub> and (b) the (PANI/RGO)<sub>10</sub> aerogel electrodes determined from their corresponding CV curves. GCD curves for (c) the (PANI/CMCNT)<sub>10</sub> and (d) the (PANI/RGO)<sub>10</sub> aerogel electrodes at different current densities. (e) CV curves for the (PANI/CMCNT)<sub>10</sub> and (PANI/RGO)<sub>10</sub> aerogel electrodes at a scan rate of 5 mV s<sup>-1</sup>. (f) GCD curves of the (PANI/CMCNT)<sub>10</sub> and (PANI/RGO)<sub>10</sub> aerogel electrodes at a current density of 3.750 mA cm<sup>-2</sup>. All data were acquired under three-electrode testing conditions.

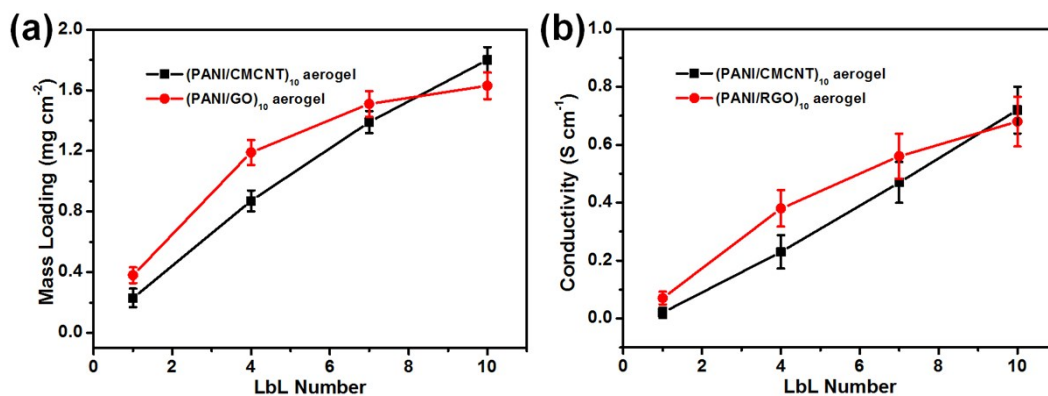

**Figure S7.** (a) Mass loadings and (b) conductivities of the (PANI/CMCNT)<sub>n</sub> and (PANI/RGO)<sub>n</sub> aerogels as functions LbL number.

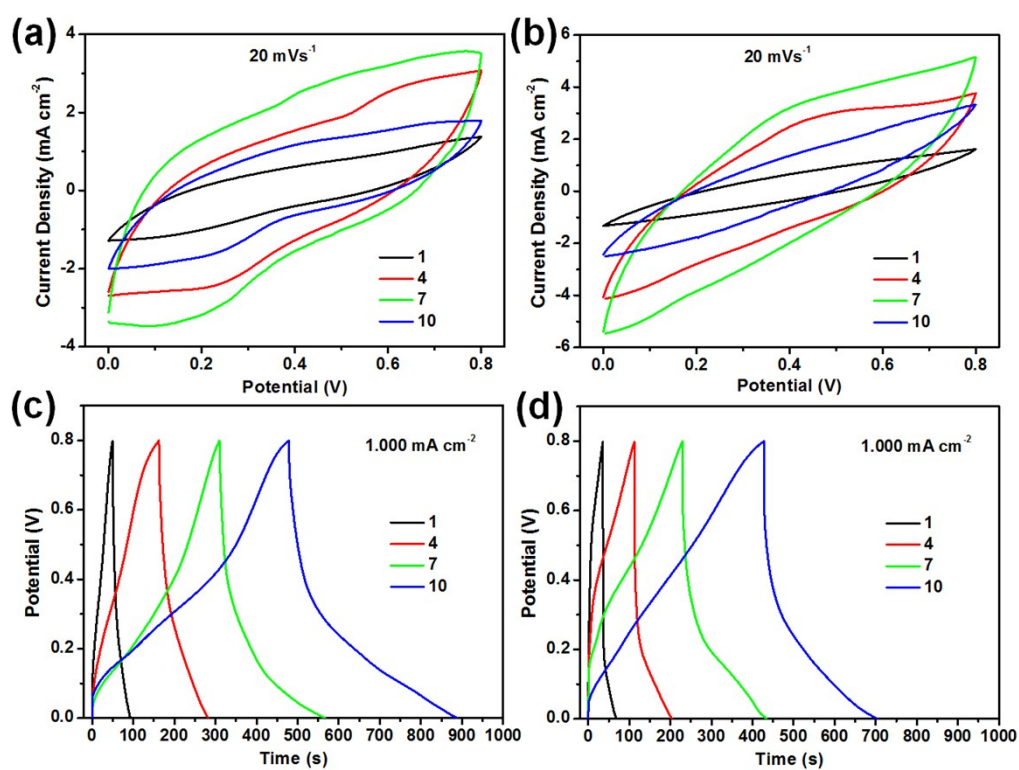

**Figure S8.** CV curves of the (a) (PANI/CMCNT)<sub>n</sub> and (b) (PANI/RGO)<sub>n</sub> aerogel electrodes acquired at a scan rate of 20 mV s<sup>-1</sup> as functions of LbL number. GCD curves of (c) the (PANI/CMCNT)<sub>n</sub> and (d) (PANI/RGO)<sub>n</sub> aerogel electrodes at a current density of 1.000 mA cm<sup>-2</sup> as functions of LbL number. All data were acquired under two-electrode testing conditions.

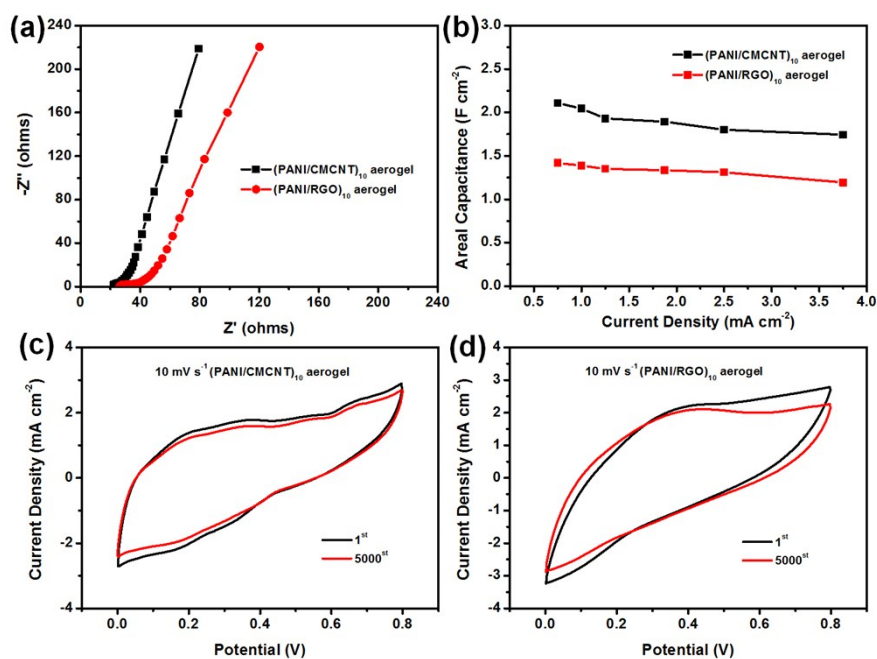

**Figure S9.** (a) Nyquist plots for the (PANI/CMCNT)<sub>10</sub> and (PANI/RGO)<sub>10</sub> aerogel electrodes. (b) Areal capacitances of the two aerogel electrodes at different current densities. CV curves for (c) the (PANI/CMCNT)<sub>10</sub> and (d) the (PANI/RGO)<sub>10</sub> aerogel electrodes during cycle-stability testing. All data were acquired under two-electrode testing conditions.

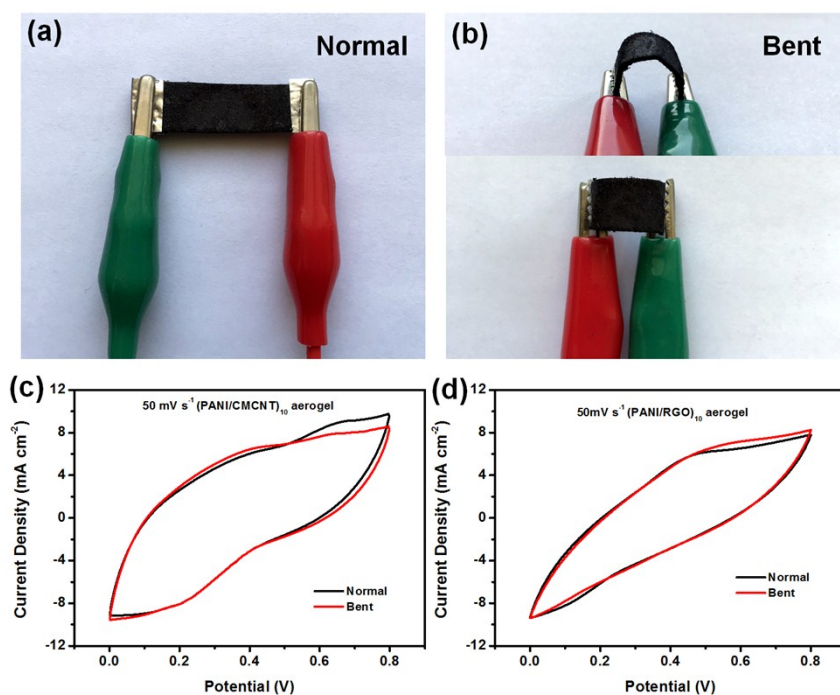

**Figure S10.** Representative photographic images of an electrode in its (a) normal and (b) bent state. CV curves of (c) the (PANI/CMCNT)<sub>10</sub> and (d) the (PANI/RGO)<sub>10</sub> aerogel electrodes during flexibility testing.
